# Supplementary material for: Patient-derived enteroids provide a platform for the development of therapeutic approaches in microvillus inclusion disease
Source: J Clin Invest. 2023 Oct 16;133(20):e169234. doi: 10.1172/JCI169234 (PMC10575727; doi:10.1172/JCI169234)
Supplement: Supplemental data [file jci-133-169234-s192.pdf]

## Supplementary Materials and Methods

### Patient Clinical Summaries

**Patient 1:** Male with microvillus inclusion disease who is sustained on parenteral nutrition (PN). Patient was diagnosed within 2 months of age secondary to intractable diarrhea with need for PN support. Endoscopic evaluation was notable for villus blunting and abnormal CD10 brush border staining. Patient's medical course has been complicated by oral aversion, central line associated bloodstream infection, iron deficiency anemia, electrolyte derangements, and PN associated liver disease. Endoscopic biopsies for enteroid generation obtained at age 3 yrs. His PN support requires sodium supplementation (ranging from 14-17 mEq/kg/day) as well as maximum acetate provision and potassium infusion (0.25 mEq/kg/h rate due to high gastrointestinal losses).

**Patient 2:** Female born at 39 weeks gestation with onset of severe secretory diarrhea within the 1st week of life associated with acidosis and severe dehydration. EGD performed at 1 month consistent with MVID (gross blunting of villi, microvillous inclusions on EM). Patient remained PN dependent until bowel transplant (age 5) with biopsies retained for enteroid generation. Underwent multivisceral transplant (liver, pancreas, small intestine and colon) with retained native duodenum. Patient alive 4 years post-transplant.

### Enteroid Media and Culture

#### *Expansion Media:*

| Component                   | Volume       | Catalog #          | Final Concentration |
|-----------------------------|--------------|--------------------|---------------------|
| L-WRN Conditioned Media     | 65 mL        | ATCC CRL-3276      | 65%                 |
| Advanced DMEM/F12           | 30 mL        | Gibco 12634-028    | 30%                 |
| GlutaMax (100X)             | 1 mL         | Gibco 35050-061    | 1%                  |
| HEPES 1M                    | 1 mL         | Gibco 15630-080    | 10 mM               |
| Primocin                    | 200 $\mu$ L  | Invivogen ant-pm-2 | 0.2%                |
| Normocin                    | 200 $\mu$ L  | Invivogen ant-nr-2 | 0.2%                |
| B27                         | 1 mL         | Gibco 12587010     | 1%                  |
| N2                          | 500 $\mu$ L  | Gibco 17502-048    | 0.5%                |
| Nicotinamide 1M             | 1 mL         | Sigma N0636        | 10 mM               |
| N-Acetyl-Cysteine (500 mM)  | 100 $\mu$ L  | Sigma A8199        | 500 $\mu$ M         |
| A 83-01 (500 $\mu$ M)       | 100 $\mu$ L  | Sigma SML0788      | 500 nM              |
| SB202190 (5 mg/505 $\mu$ L) | 33.2 $\mu$ L | Sigma S7067        |                     |

|                            |               |                  |          |
|----------------------------|---------------|------------------|----------|
| EGF (500 µg/mL)            | 10 µL         | Peprotech 315-09 | 50 ng/mL |
| Gastrin (500 µM)           | 10 µL         | Sigma G9145      | 10 nM    |
| Prostaglandin E2 (5 mg/mL) | 1 µL          | Sigma P5640      | 100 nM   |
| Y-27632 (3.2 mg/mL)        | 100 µL        | Sigma Y0503      | 10 µM    |
| <b>Total Volume</b>        | <b>100 mL</b> |                  |          |

*Differentiation Media:*

| <b>Component</b>          | <b>Volume</b> | <b>Catalog #</b>   | <b>Final Concentration</b> |
|---------------------------|---------------|--------------------|----------------------------|
| L-WRN Conditioned Media   | 15 mL         | ATCC CRL-3276      | 15%                        |
| Advanced DMEM/F12         | 80 mL         | Gibco 12634-028    | 80%                        |
| GlutaMax (100X)           | 1 mL          | Gibco 35050-061    | 1%                         |
| HEPES 1M                  | 1 mL          | Gibco 15630-080    | 10 mM                      |
| Primocin                  | 200 µL        | Invivogen ant-pm-2 | 0.2%                       |
| Normocin                  | 200 µL        | Invivogen ant-nr-2 | 0.2%                       |
| B27                       | 1 mL          | Gibco 12587010     | 1%                         |
| N2                        | 500 µL        | Gibco 17502-048    | 0.5%                       |
| Nicotinamide 1M           | 1 mL          | Sigma N0636        | 10 mM                      |
| N-Acetyl-Cystein (500 mM) | 100 µL        | Sigma A8199        | 500 µM                     |
| EGF (500 µg/mL)           | 10 µL         | Peprotech 315-09   | 50 ng/mL                   |
| <b>Total Volume</b>       | <b>100mL</b>  |                    |                            |

*Plating on Transwells:*

Formed enteroids were removed from tissue culture plates and Matrigel® was dissolved in Cell-recovery solution (Corning). Enteroids were dissociated by vigorous pipetting and incubation at 37°C with TRIPL-E (ThermoFisher) for 2-3 mins. Cells were plated onto human placental collagen IV [Please confirm collagen type] (Sigma)-coated Transwell filters (Corning) with 0.3-µm-pore size inserts and cultured for 2-4 days in Expansion media including Rho Kinase inhibitor (Y-27632) until transepithelial resistance (TEER) started to rise. Media was switched to the differentiation media and electrophysiological and immunohistological measurements done after 10-12 days, when TEER reached to >2000Ω/cm<sup>2</sup>.

*Plating on Coverslips:*

Formed enteroids were removed from tissue culture plates and Matrigel® was removed in Cell-recovery solution. Enteroids were dissociated by vigorous pipetting and incubation at 37°C with TRIPL-E for 2-3 mins. Cells were plated onto human placental collagen coated coverslips and cultured in the differentiation media ± DAPT for four days.

### **Enteroid Formation Assay**

Formed enteroids (P1-3) were removed from tissue culture plates and Matrigel® was removed in cell-recovery solution. Enteroids were dissociated by vigorous pipetting and incubation at 37°C with TRIPL-E for 2-3mins. Cells were counted and re-plated in Matrigel® for MVID and healthy enteroids at approximately same density. Cells were cultured in the expansion media for 3 days and formed enteroid numbers were counted in each plate well.

### **Enteroid Swelling Assay**

Enteroid swelling after Crofelemer (100 µM) or vehicle treatment (PBS) was performed as previously described (1). In brief, Crofelemer or vehicle (PBS) was administered 30mins prior to forskolin 10µM. Enteroids were imaged every 10mins for 2hours using an automated plate imaging system (Biotek Cytation 5, Agilent Santa Clara, CA). Measurements of cell diameter were carried out using Image J with the Object J plugin.

### **EM image analysis**

EM images (at least 10-15 per enteroid) were analyzed blinded in Image J for measurement of microvilli and actin bundle length and distance between apical membrane and the majority of cell organelles.

### **qPCR primer sequences**

#### PCR primer sequences:

Human SGK2;

Primer 1: 5'- CCACGGACTTCGACTTCCTC -3'

Primer 2: 5'- GTGCCGCACGTTCTTCAGA -3'

Human PDZK1:

PrimeTime™ Predesigned qPCR Assays (Assay Id: Hs.PT.58.4953162)

Human RAB32:

Primer 1: 5'- CAGGTGGACCAATTCTGCAAA -3'

Primer 2: 5'- GGCAGCTTCCTCTATGTTTATGT -3'

**MxIF Antibodies**

|              |                 |             |                              |
|--------------|-----------------|-------------|------------------------------|
| ACTG1        | sc-65638 AF488  | AB_2890619  | 1:100                        |
| Beta-catenin | NBP1-54467IR    | 12F7        | 1:50                         |
| CD10         | sc-46656 AF488  | AB_2890648  | 1:100                        |
| CHGA         | NBP2-47850IR    | CGA/493     | 1:2000                       |
| Defensin 5A  | NB110-60002IR   | 8c8         | 1:200                        |
| Cd26/DPP4    | NBP2-70588C     | OTI11D7     | 1:200                        |
| EGFR pY1068  | ab205828        | AB_2890267  | 1:200                        |
| Ep-CAM       | ab275122        | EPR677(2)   | 1:100                        |
| GLUT2        | NBP2-22218AF647 | AB_2890913  | 1:50                         |
| LAMP2A       | ab282009        | EPR4207(2)  | 1:50                         |
| MYO5B        | NBP1-87746      | AB_11034537 | 5 $\mu$ g/ml (Zenon labeled) |
| pNHE3        | NB110-81529R    | 14D5        | 1:50                         |
| SGLT1        | NBP2-38748      | AB_2890609  | 5 $\mu$ g/ml (Zenon labeled) |
| Villin       | sc-58897 AF488  | 1D2C3       | 1:50                         |

## **Supplemental Acknowledgments**

PediCODE Consortium Members:

Martín G. Martín, University of California, Los Angeles

Wayne Lencer, Boston Children's Hospital

Aleixo Muise, The Hospital for Sick Children, Toronto

Yaron Avitzur, The Hospital for Sick Children, Toronto

Sari Acra, Vanderbilt University Medical Center

A

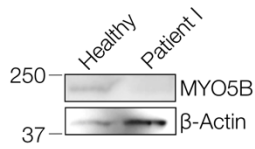

B

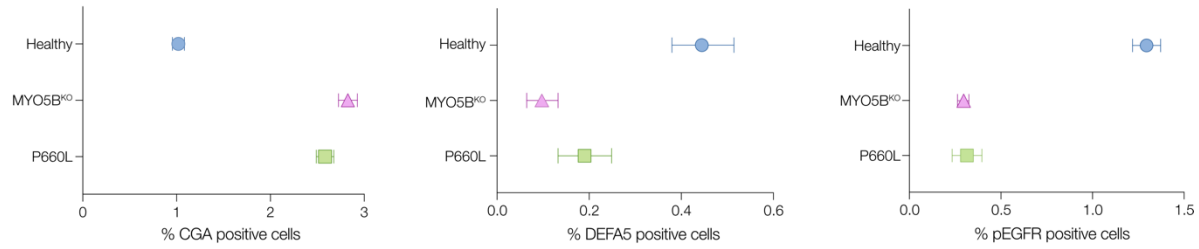

C

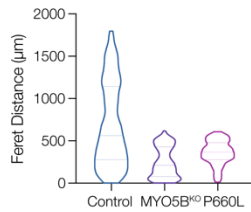

Supplementary Figure 1

**SUPPLEMENTARY FIGURE 1:** **A.** Immunoblot of MYO5B in healthy control sample and Patient 1. **B.** Graphs showing whole biopsy counts of positive cells for Chromogranin A (CGA), Defensin alpha 5 (DEFA5) and phospho-Epidermal Growth Factor Receptor (pEGFR). Error bars represent means  $\pm$  SD, n=3-4 sections **C.** Graph of continuity analysis (Feret's Distance) of linear CD10 staining across all biopsy images in Fig 2.

Healthy

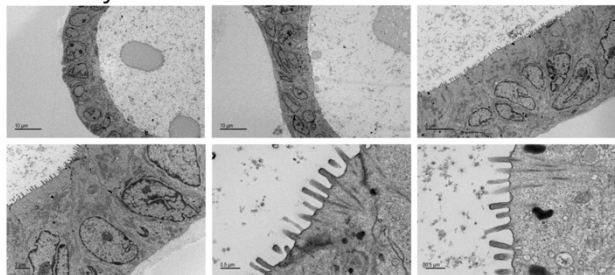

Healthy + DAPT

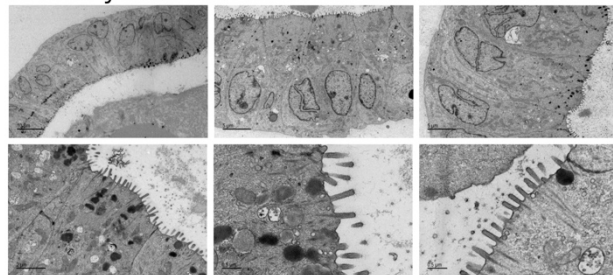

MVID1 (MYO5B<sup>KO</sup>)

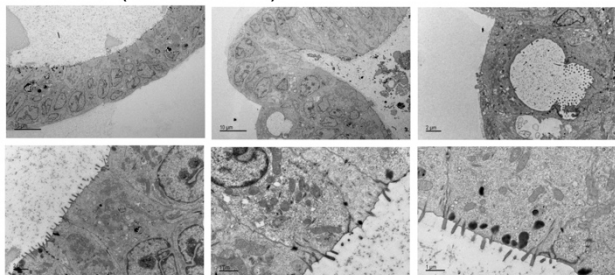

MVID1 + DAPT

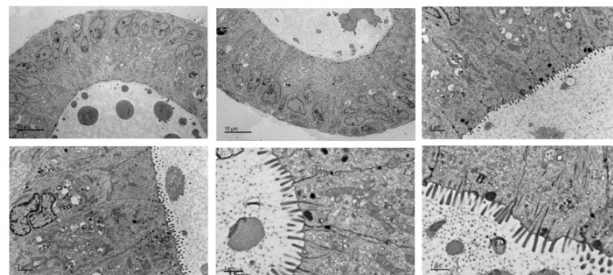

MVID2 (P660L)

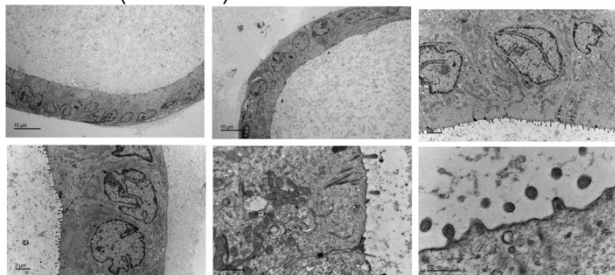

MVID2 + DAPT

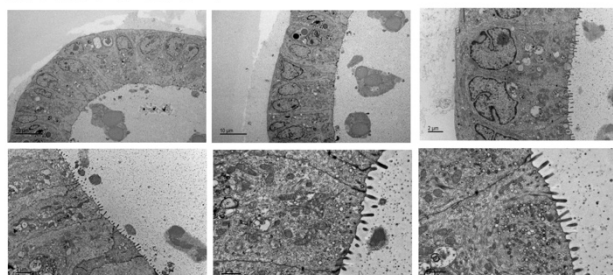

**SUPPLEMENTARY FIGURE 2:** Electron micrographs of healthy and MVID enteroids  $\pm$  DAPT (10  $\mu$ M).

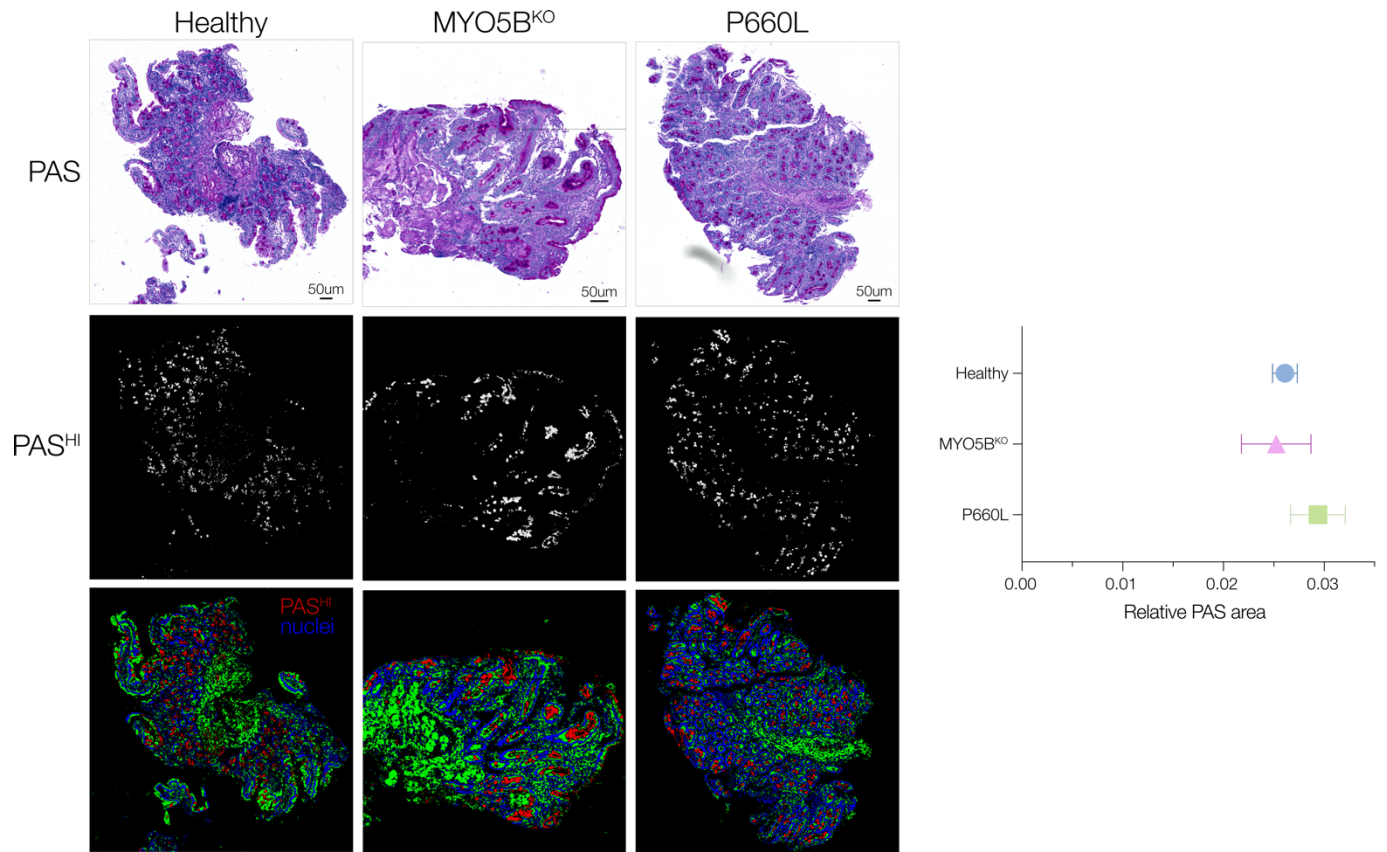

Supplementary Figure 3

**SUPPLEMENTARY FIGURE 3:** Immunofluorescence images of human duodenal biopsy sections stained for PAS (left) to show goblet cells, with analysis to show highly stained PAS cells (PAS<sup>HI</sup>). Graph showing area of PAS<sup>HI</sup> relative to total cells. Error bars represent means  $\pm$  SD, n=3 sections

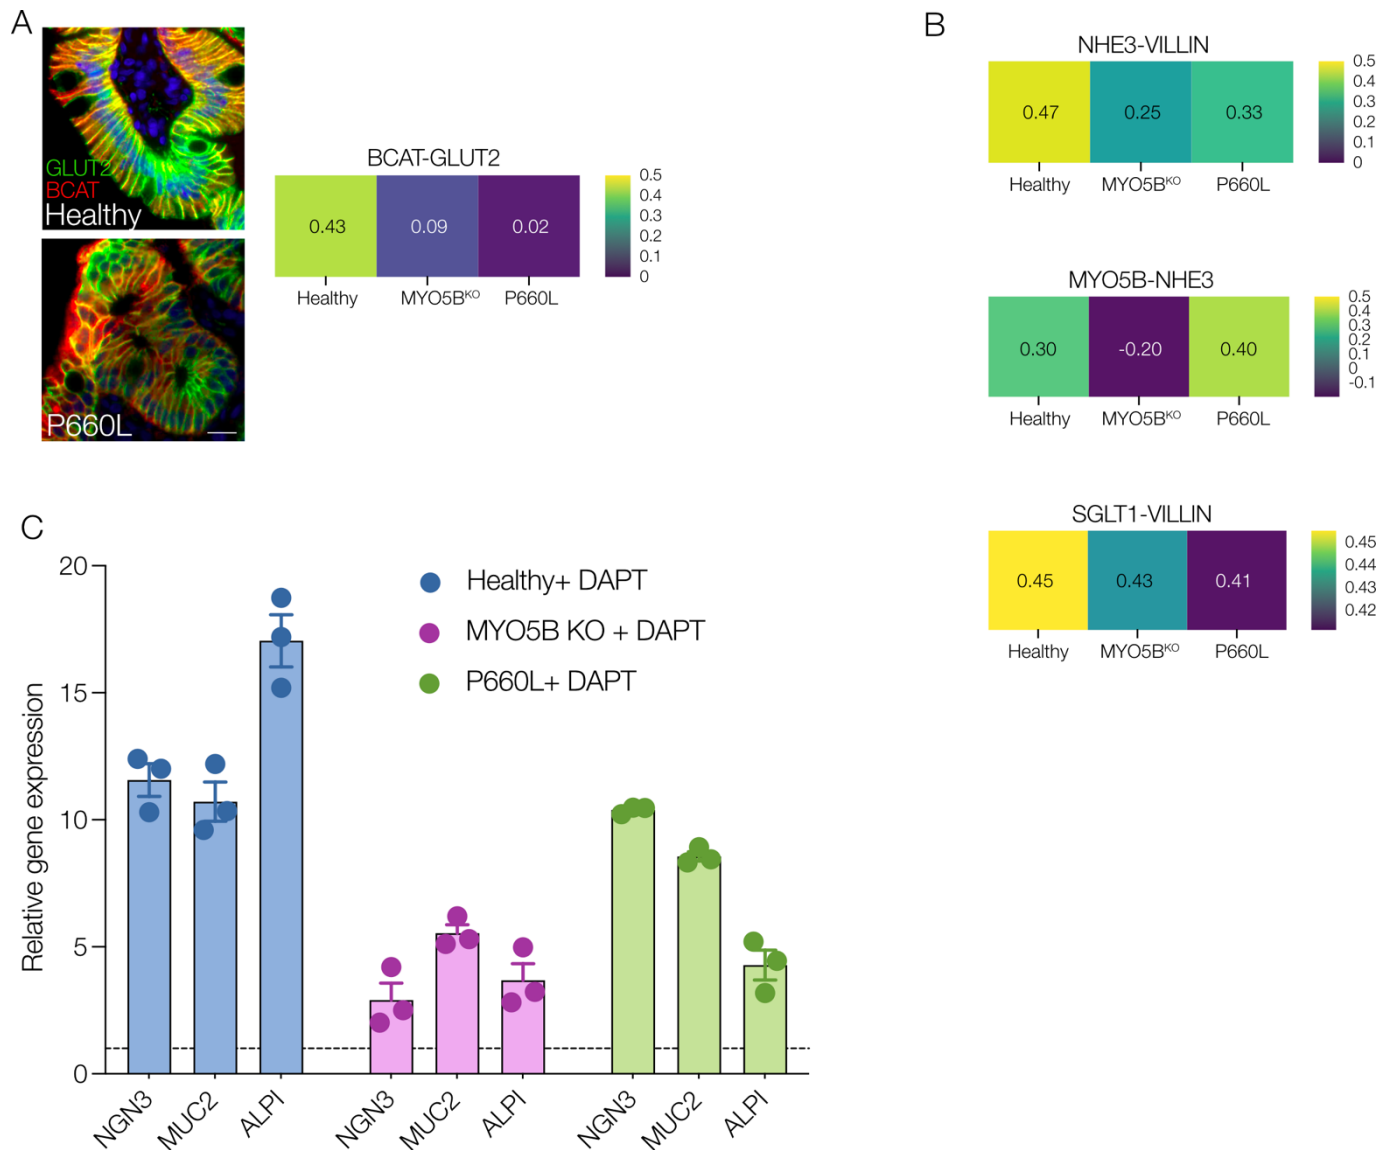

**SUPPLEMENTARY FIGURE 4: A.** Individual pair-wise staining for Glucose Transporter 2 (GLUT2) and beta-catenin (BCAT) with heatmap of pairwise Pearson's correlation coefficient with numerical coefficient in box center. **B.** Heatmap of pairwise Pearson's correlation coefficient for Na<sup>+</sup>/H<sup>+</sup> exchanger 3 (NHE3) and Villin, Sodium-Glucose Cotransporter 1 (SGLT1) and Villin, and Myosin 5b (MYO5B) and NHE3 **C.** Relative gene expression (normalized to differentiated) for neurogenin3 (NGN), mucin 2 (MUC2) and alkaline phosphatase (ALPI) in healthy and MVID enteroids following addition of DAPT. Dotted line indicates baseline without DAPT. Error bars represent means  $\pm$  SEM, n=3 experiments.

A

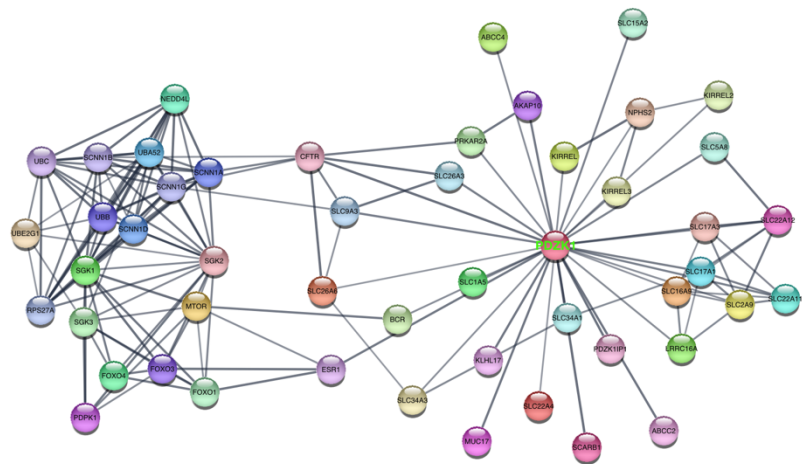

B

|                                             | "-log 10 (P-value)" |
|---------------------------------------------|---------------------|
| <b>GO:BP</b>                                |                     |
| response to organophosphorus                | 2.52                |
| response to purine-containing compound      | 2.22                |
| positive regulation of transport            | 1.99                |
| response to fatty acid                      | 1.79                |
| response to xenobiotic stimulus             | 1.71                |
| positive regulation of transporter activity | 1.64                |
| small molecule metabolic process            | 1.54                |
| lipid metabolic process                     | 1.44                |
| response to lipid                           | 1.41                |
| <b>KEGG</b>                                 |                     |
| homocysteine metabolic process              | 1.31                |
| <b>REAC</b>                                 |                     |
| PPAR signaling pathway                      | 3.50                |
| Metabolic pathways                          | 2.14                |
| PPARA activates gene expression             | 1.85                |
| Regulation of lipid metabolism by PPARalpha | 1.83                |
| Signaling by Retinoic Acid                  | 1.45                |
| <b>HPA</b>                                  |                     |
| duodenum; enterocytes - Microvilli          | 2.00                |
| duodenum; endocrine cells                   | 1.73                |
| duodenum; enterocytes - Microvilli          | 1.55                |
| small intestine; enterocytes                | 1.49                |
| colon; enterocytes - Microvilli             | 1.31                |

C

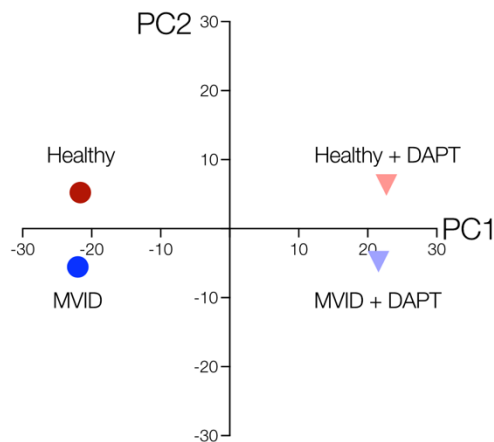

**SUPPLEMENTARY FIGURE 5: A.** STRING protein interaction network analysis for SGK2 and PDZK1. **B.** Pathway analysis showing most significant GO terms, HPA terms and KEGG pathways with P-values. **C.** Principal component analysis (PCA) plot showing global transcriptome changes in healthy and MVID enteroids following DAPT treatment.

**SUPPLEMENTARY MOVIE 1:** Lightsheet microscopy scan showing three-dimensional MVID enteroid stained for actin (white) and nuclei (blue) indicating abnormal intracellular large inclusions with microvilli.
